# Supplementary material for: Characterization of the Human Papillomavirus 16 Oncogenes in K14HPV16 Mice: Sublineage A1 Drives Multi-Organ Carcinogenesis
Source: MDPI journal article supplement (doi:10.3390/ijms232012371), 2022-10-15
Supplement: s1 [file s1]

**Table S1.** Characterization of mouse samples.

| Sample | Animal     | Sample tissue | HPV DNA      |
|--------|------------|---------------|--------------|
| 1      | I<br>WT    | skin          | not detected |
| 2      |            | liver         | not detected |
| 3      |            | lymph node    | not detected |
| 4      |            | tongue        | not detected |
| 5      | II<br>WT   | skin          | not detected |
| 6      |            | liver         | not detected |
| 7      |            | lymph node    | not detected |
| 8      |            | tongue        | not detected |
| 9      | III<br>MUT | skin          | HPV16        |
| 10     |            | liver         | HPV16        |
| 11     |            | lymph node    | HPV16        |
| 12     |            | tongue        | HPV16        |
| 13     | IV<br>MUT  | skin          | HPV16        |
| 14     |            | liver         | HPV16        |
| 15     |            | lymph node    | HPV16        |
| 16     |            | tongue        | HPV16        |
| 17     |            | oral tumour   | HPV16        |

Legend: animal group WT wild-type FVB; MUT FVB-K14HPV16.
