# Supplementary material for: Characterization of the Human Papillomavirus 16 Oncogenes in K14HPV16 Mice: Sublineage A1 Drives Multi-Organ Carcinogenesis
Source: MDPI journal article supplement (doi:10.3390/ijms232012371), 2022-10-15
Supplement: s1 [file s1]

Supplementary Table S2. Genome sequences of representative strains from HPV16 lineages and sublineages include in the analysis.

| GenBank  | Lineage | Sublineage | Name                 |
|----------|---------|------------|----------------------|
| K02718   | A       | A1         | European (E)         |
| AF536179 | A       | A2         | European (E)         |
| HQ644236 | A       | A3         | European (E)         |
| AF534061 | A       | A4         | Asian, E(As)         |
| AF536180 | B       | B1         | African-1, Afr1a     |
| HQ644298 | B       | B2         | African-1, Afr1b     |
| AF472509 | C       | -          | African-2, Afr2a     |
| HQ644257 | D       | D1         | North American (NA)1 |
| AY686579 | D       | D2         | Asian–American (AA)2 |
| AF402678 | D       | D3         | Asian–American (AA)1 |
