# Supplementary material for: Characterization of the Human Papillomavirus 16 Oncogenes in K14HPV16 Mice: Sublineage A1 Drives Multi-Organ Carcinogenesis
Source: MDPI journal article supplement (doi:10.3390/ijms232012371), 2022-10-15
Supplement: s1 [file s1]

[illegible]

legend: NC non coding region
